# Supplementary material
Source: PubMed Central journal article supplement (PMC5955819)

A

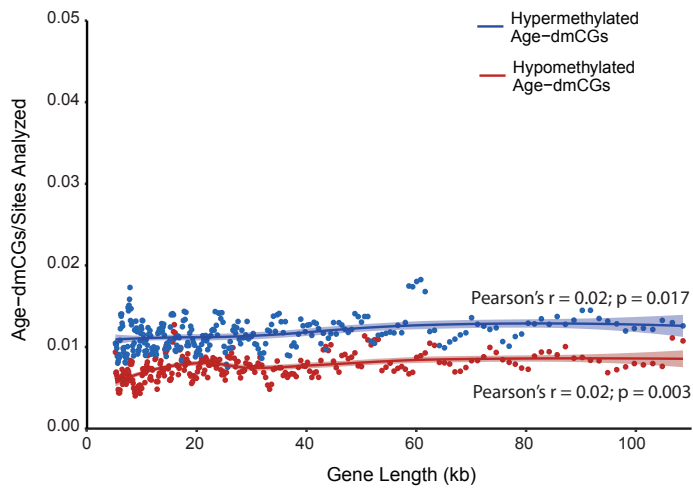

B

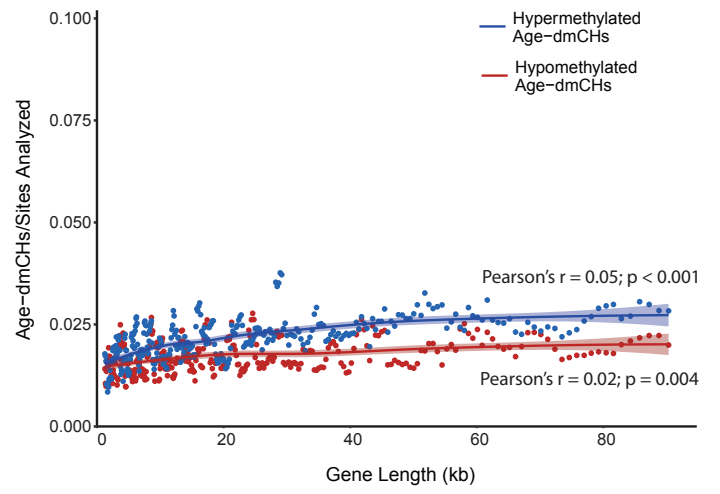

Supplement: NIHMS958100-supplement-1.pdf [file NIHMS958100-supplement-1.pdf]

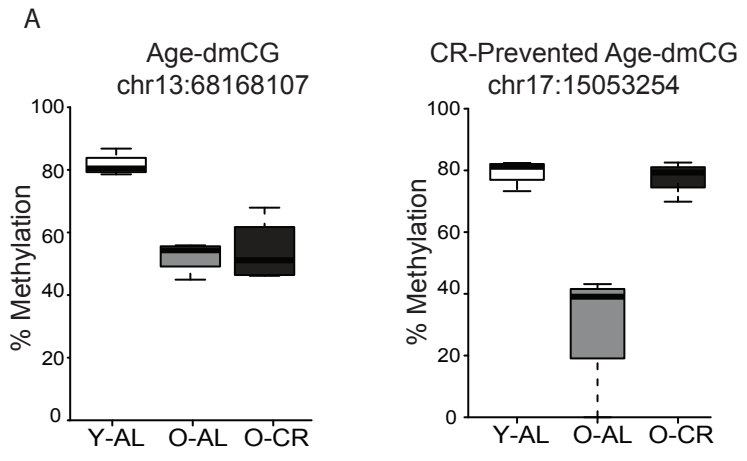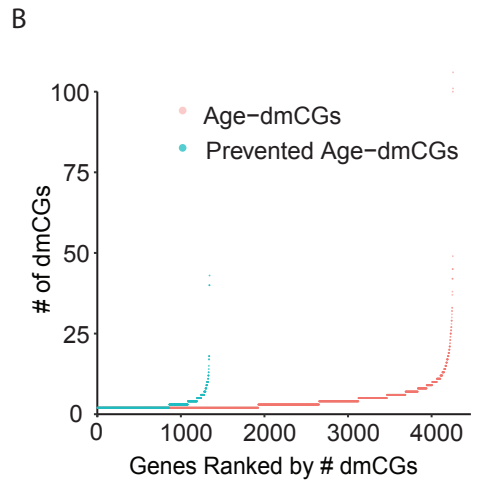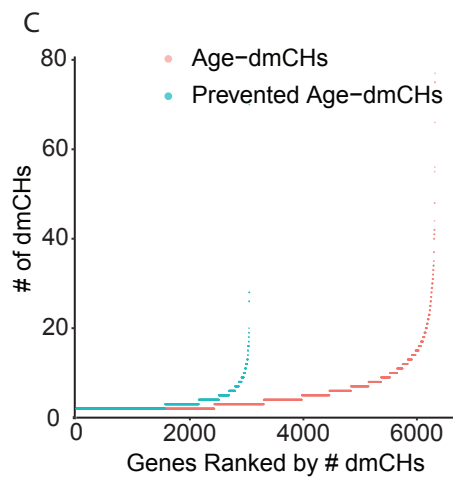

Supplement: NIHMS958100-supplement-2.pdf [file NIHMS958100-supplement-2.pdf]

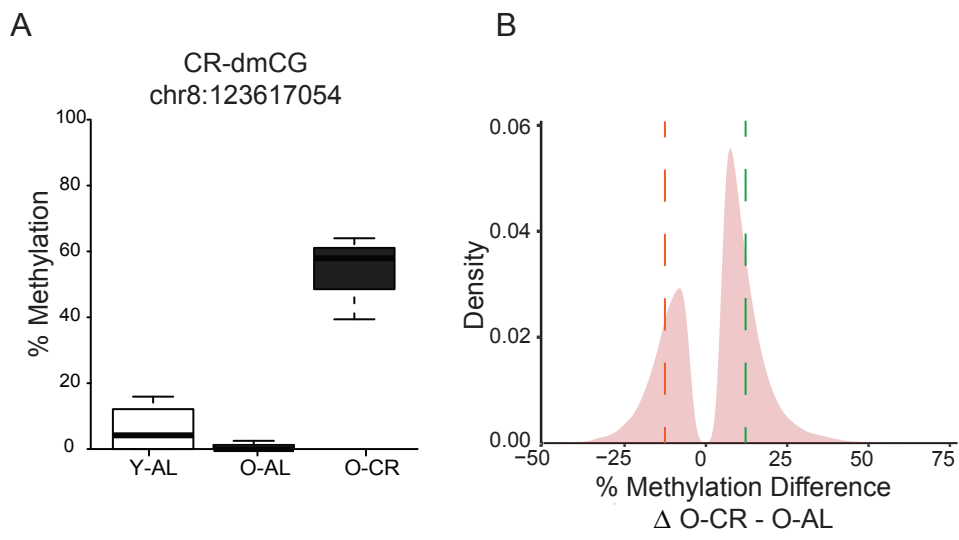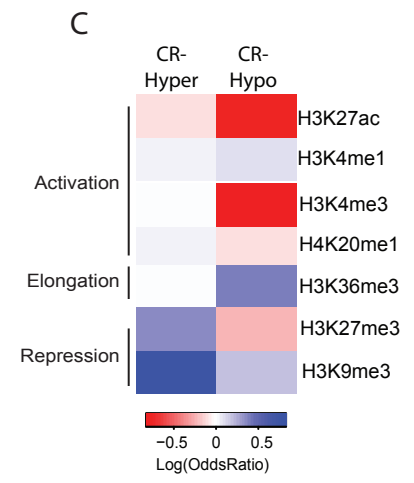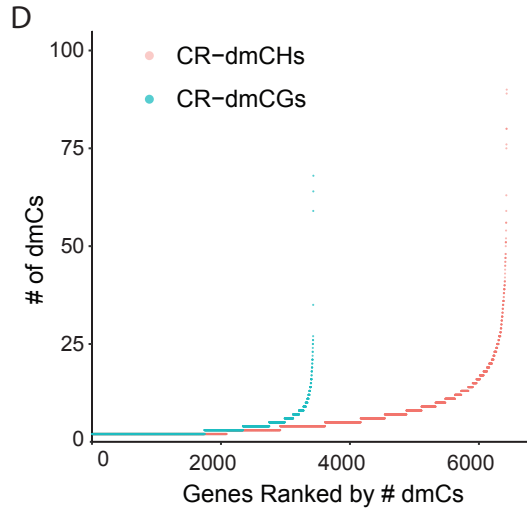

Supplement: NIHMS958100-supplement-3.pdf [file NIHMS958100-supplement-3.pdf]

A

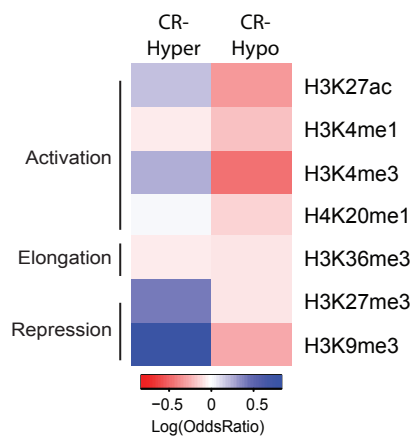

Supplement: NIHMS958100-supplement-4.pdf [file NIHMS958100-supplement-4.pdf]
